# Supplementary material for: Synthesis, interface (Au/M2Pc2/p-Si), electrochemical and electrocatalytic properties of novel ball-type phthalocyanines
Source: Royal Society of Chemistry journal article supplement (doi:10.1039/c2dt00041e), 2012-01-01
Supplement: c2dt00041e.pdf [file c2dt00041e.pdf]

## Supplementary Information

**Synthesis, interface (Au/M<sub>2</sub>Pc<sub>2</sub>/p-Si), electrochemical and electrocatalytic properties of novel ball-type phthalocyanines**

**Abdurrahman Şengül, H. Zekeriya Doğan, Ahmet Altındal, Ali Rıza Özkaya, Bekir Salih, Özer Bekaroğlu**

### Figures of Contents

**Figure S1** <sup>1</sup>H-NMR spectrum of compound **3** in DMSO-d<sub>6</sub>-----S2

**Figure S2** <sup>1</sup>H-NMR spectrum of compound **6** in DMSO-d<sub>6</sub> -----S2

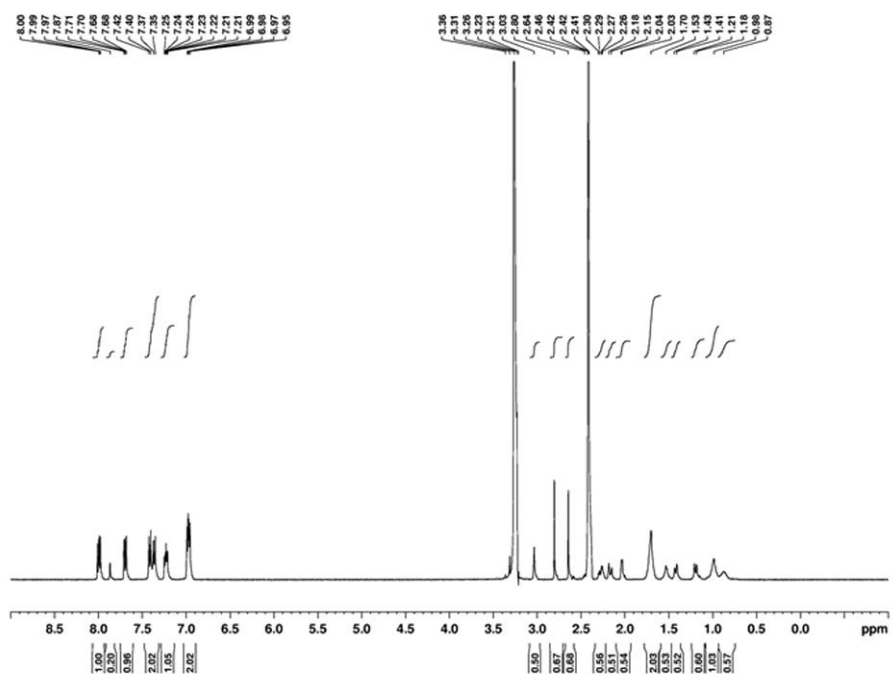

Fig. S1.  $^1\text{H-NMR}$  spectrum of compound **3** in  $\text{DMSO-d}_6$ .

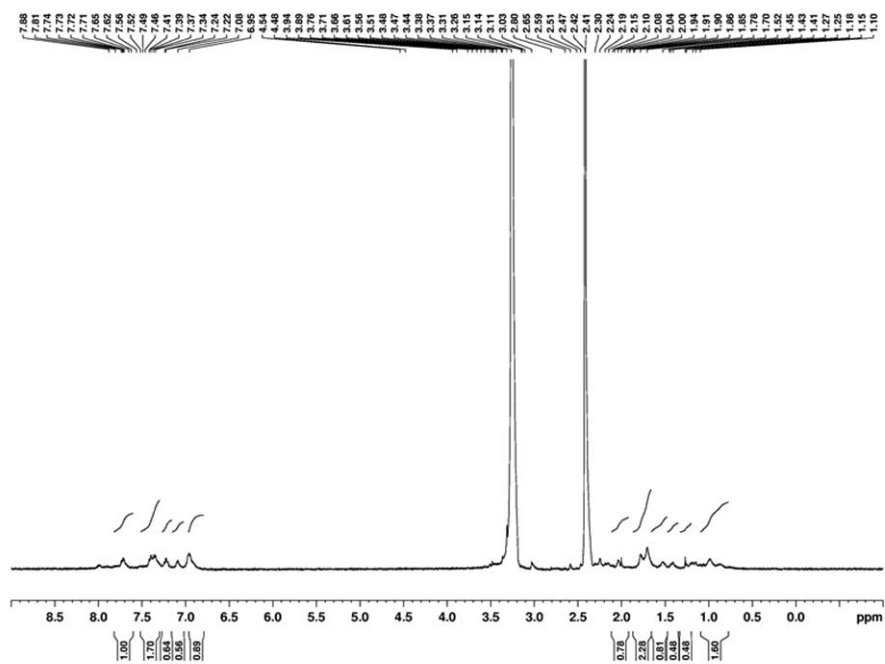

Fig. S2.  $^1\text{H-NMR}$  spectrum of compound **6** in  $\text{DMSO-d}_6$ .
